# Supplementary material for: Machine learning in renal pathology
Source: Frontiers journal article supplement (doi:10.3389/fneph.2022.1007002), 2022-11-29
Supplement: Data_Sheet_1.PDF [file Data_Sheet_1.PDF]

## Supplemental Material

### Clinical Information

The dataset was obtained from Toronto General Hospital (TGH) in Toronto, Ontario, Canada and has institutional research board approval. This dataset consists of WSIs of renal biopsies from  $n = 45$  different patients with  $n = 15$  WSIs per disease (MCD, TBMN, and MN), derived from pathologist (R.J.) assessment using LM, IF, and EM. **Table S1** details additional clinical information such as age, sex, and disease specific information.

**Table S1.** Additional clinical information from the TGH dataset.

| Collective Statistics |                | Value       | MCD Statistics           |                | Value        | MN Statistics       |                | Value       | TBMN Statistics     |                | Value       |
|-----------------------|----------------|-------------|--------------------------|----------------|--------------|---------------------|----------------|-------------|---------------------|----------------|-------------|
| Number of Patients    |                | 45          | Number of Patients       |                | 15           | Number of Patients  |                | 15          | Number of Patients  |                | 15          |
| Number of Glomeruli   |                | 375         | Number of Glomeruli      |                | 103          | Number of Glomeruli |                | 148         | Number of Glomeruli |                | 124         |
| Age (years)           |                |             | Age (years)              |                |              | Age (years)         |                |             | Age (years)         |                |             |
| Sex                   | Mean (SD)      | 48.1 (17.3) | Sex                      | Mean (SD)      | 44 (21.2)    | Sex                 | Mean (SD)      | 54.5 (16.1) | Sex                 | Mean (SD)      | 45.8 (11.2) |
|                       | Median (Range) | 49 (19-95)  |                          | Median (Range) | 41 (19-95)   |                     | Median (Range) | 53 (26-81)  |                     | Median (Range) | 43 (31-64)  |
|                       | Male (%)       | 20 (44.4%)  |                          | Male (%)       | 10 (66.7%)   |                     | Male (%)       | 9 (60%)     |                     | Male (%)       | 1 (6.7%)    |
|                       | Female (%)     | 25 (55.6%)  |                          | Female (%)     | 5 (33.3%)    |                     | Female (%)     | 6 (40%)     |                     | Female (%)     | 14 (93.3%)  |
|                       |                |             | Foot Podocyte Effacement |                |              | PLA2R               |                |             | Genetic Testing     |                |             |
|                       |                |             | Mean (SD)                |                | 92.7 (9.3)   | Negative (%)        |                | 3 (20%)     |                     |                | None        |
|                       |                |             | Median (Range)           |                | 100 (70-100) | Positive (%)        |                | 9 (60%)     |                     |                |             |
|                       |                |             |                          |                |              | Not Determined (%)  |                | 3 (20%)     |                     |                |             |

### Deep Learning Pre-processing

**Table S2.** Data augmentation techniques performed.

| Methods         | Parameters      |
|-----------------|-----------------|
| Rotate          | -90, 90 degrees |
| Width Shift     | 50 pixels       |
| Height Shift    | 50 pixels       |
| Zoom            | 50% larger      |
| Horizontal Flip | 25% probability |
| Vertical Flip   | 25% probability |

**Table S3.** Comparing number of deep learning network parameters (in million). Bolded values indicate a decrease in number of parameters when using global average pooling (GAP) layer.

| Network     | Number of Parameters (in million) |
|-------------|-----------------------------------|
| VGG16       | 165.73                            |
| VGG16-GAP   | <b>14.88</b>                      |
| VGG19       | 171.05                            |
| VGG19-GAP   | <b>20.19</b>                      |
| InceptionV3 | 22.36                             |

## Deep Learning Training/Validation Curves

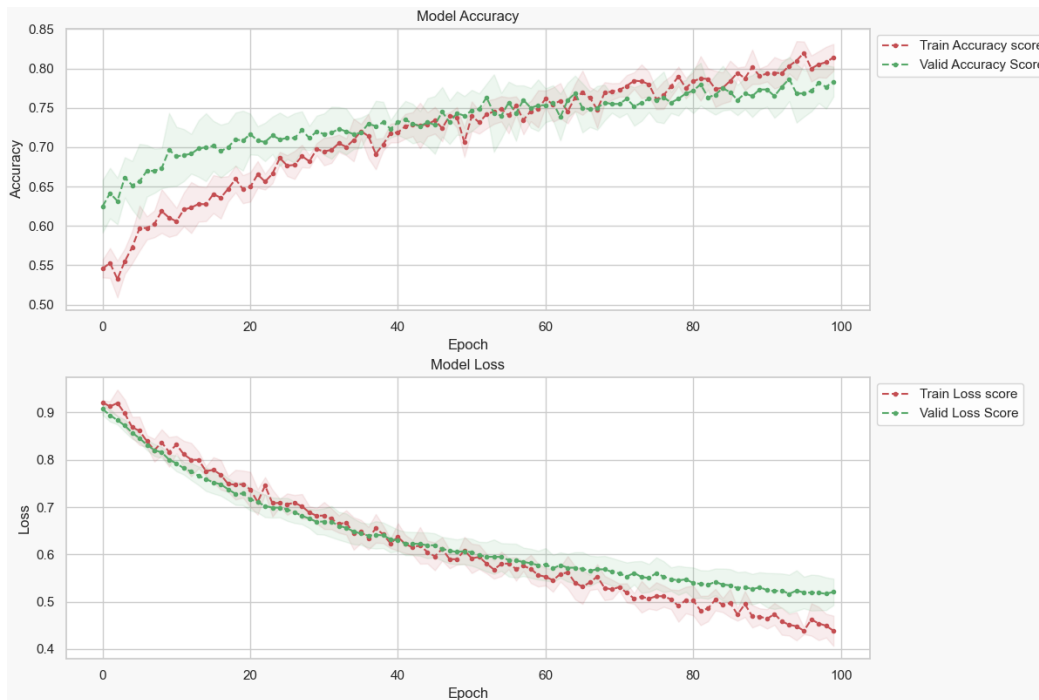

**Figure S1.** VGG16 five-fold training and cross-validation curves. Model accuracy and loss are plotted against the number of epochs.

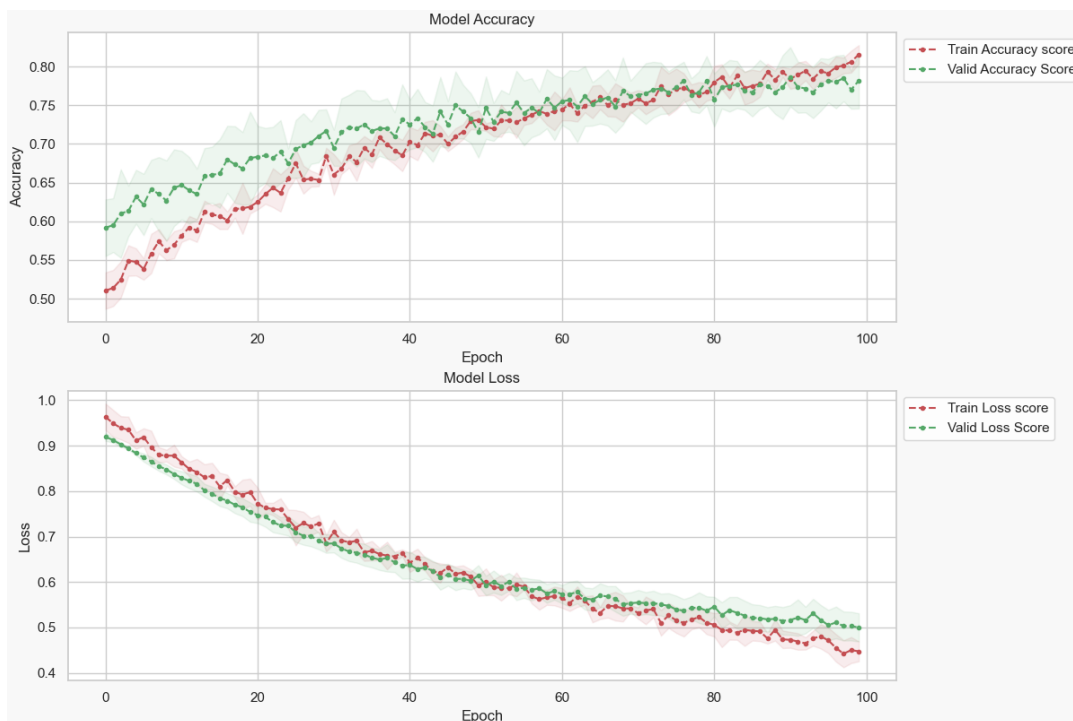

**Figure S2.** VGG19 five-fold training and cross-validation curves. Model accuracy and loss are plotted against the number of epochs.

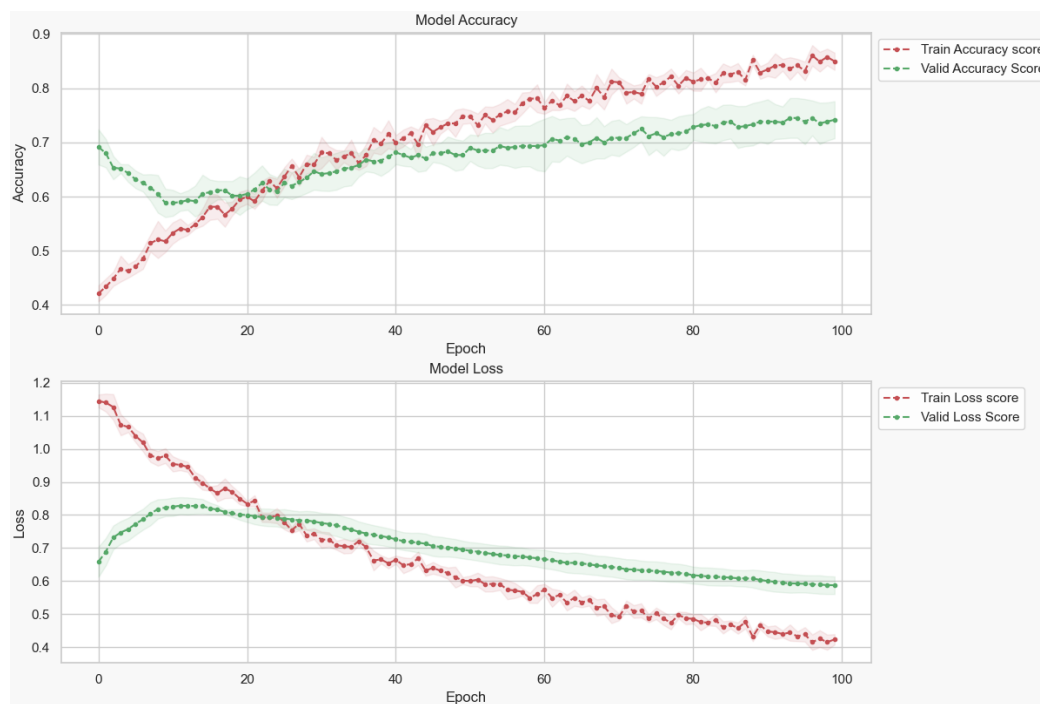

**Figure S3.** InceptionV3 five-fold training and cross-validation curves. Model accuracy and loss are plotted against the number of epochs.
